# Supplementary material for: Calculations of the effect of catalyst size and structure on the electrocatalytic reduction of CO2 on Cu nanoclusters
Source: Royal Society of Chemistry journal article supplement (doi:10.1039/d3nr04956f), 2024-01-01
Supplement: d3nr04956f1.pdf [file d3nr04956f1.pdf]

Supplementary Information for:  
**Calculations of the effect of catalyst size and structure on the electrocatalytic reduction of CO<sub>2</sub> on Cu nanoclusters**

Geoffrey R. Weal,<sup>a,b</sup> Kristinn Ingi Guðmundsson,<sup>c</sup> Frank D. Mackenzie,<sup>a,b</sup> John R. Whiting,<sup>a,b</sup> Nicholas B. Smith,<sup>a,b</sup> Egill Skúlason,<sup>c</sup> and Anna L. Garden<sup>\*a,b</sup>

<sup>a</sup> Department of Chemistry, University of Otago, P.O. Box 56, Dunedin 9054, New Zealand.

<sup>b</sup> The MacDiarmid Institute for Advanced Materials and Nanotechnology, Victoria University of Wellington, P.O. Box 600, Wellington 6140, New Zealand.

<sup>c</sup> Science Institute and Faculty of Industrial Engineering, Mechanical Engineering and Computer Science, University of Iceland, VR-III, 107 Reykjavík, Iceland.

anna.garden@otago.ac.nz

## Contents

|   |                                                                                                                      |    |
|---|----------------------------------------------------------------------------------------------------------------------|----|
| 1 | RGL potential for describing cluster energies in global optimisation                                                 | 2  |
| 2 | Different rearrangements of the lining of partial shell icosahedral Cu <sub>101</sub> and Cu <sub>124</sub> clusters | 3  |
| 3 | Relative energies of Cu clusters with adatoms or vacancies                                                           | 4  |
| 4 | Adsorption energies and adsorption sites                                                                             | 6  |
| 5 | Free energy diagrams of Cu surface models and clusters                                                               | 13 |
| 6 | Free energy diagrams at calculated limiting potentials                                                               | 18 |
| 7 | Structures of lowest energy off-size clusters                                                                        | 21 |
| 8 | Geometric parameters and Bader charges of *COOH                                                                      | 22 |
| 9 | Density of states of *COOH                                                                                           | 23 |

# 1 RGL potential for describing cluster energies in global optimisation

Cluster energies in the global optimisation were described with the Rosato-Guillop -Legrand (RGL) potential:

$$E_{cluster} = \sum_{i=1}^N \{E_i^{rep} + E_i^{att}\} \quad (1)$$

$$E_i^{rep} = \sum_{j \neq i}^N A e^{-p \left( \frac{r_{ij}}{r_0} - 1 \right)} \quad (2)$$

$$E_i^{att} = - \left[ \sum_{j \neq i}^N \xi^2 e^{-2q \left( \frac{r_{ij}}{r_0} - 1 \right)} \right]^{\frac{1}{2}} \quad (3)$$

where  $r_{ij}$  is the distance between atoms  $i$  and  $j$ , and  $A$ ,  $p$ ,  $q$ ,  $\xi$ , and  $r_0$  are fitted parameters taken from Cleri and Rosato (Table S1).<sup>1</sup> While Cleri and Rosato set a cutoff radius for the RGL potential to the fifth nearest neighbour, we chose to extend the RGL cutoff radius to infinity (i.e. no cutoff radius was considered).

Table S1 The parameters used in the Rosato-Guillop -Legrand (RGL) potential for Cu, as given by Cleri and Rosato<sup>1</sup>.

| $p$    | $q$    | $A$ (eV) | $\xi$ (eV) | $r_0$ ( ) |
|--------|--------|----------|------------|-----------|
| 10.960 | 2.2780 | 0.0855   | 1.2240     | 2.556     |

## 2 Different rearrangements of the lining of partial shell icosahedral $\text{Cu}_{101}$ and $\text{Cu}_{124}$ clusters

Figures S1 and S2 show selected examples of partial shell icosahedral  $\text{Cu}_{101}$  and  $\text{Cu}_{124}$  clusters with rearranged atoms about the lining of the partial shell.

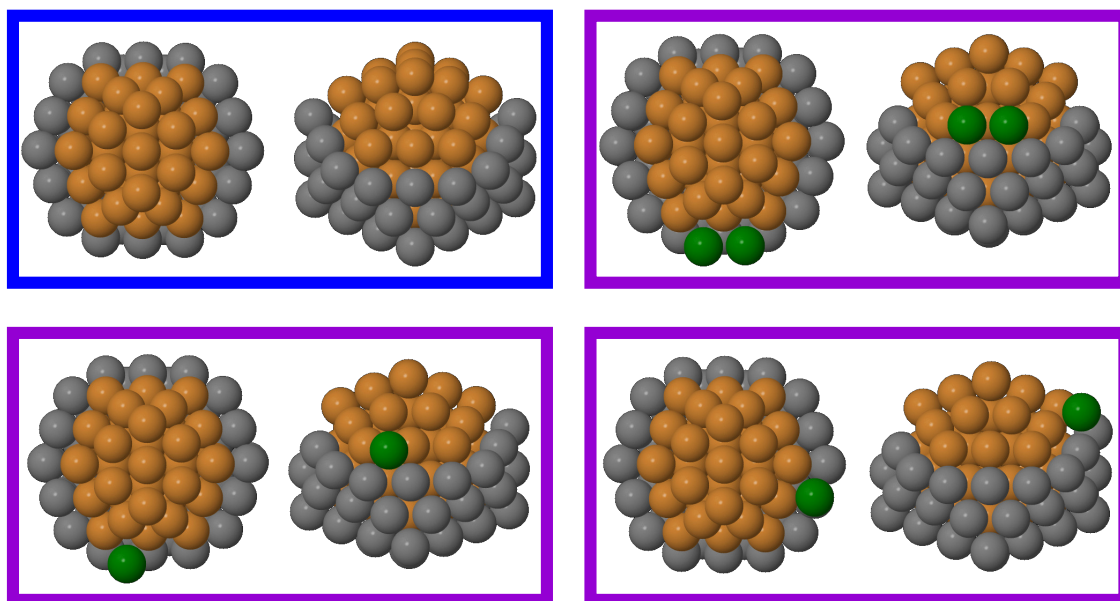

Figure S1 Various structures of the partial shell icosahedral  $\text{Cu}_{101}$  clusters with rearranged atoms about the lining of the shell. Selected examples of these rearranged partial shell icosahedral  $\text{Cu}_{101}$  clusters are given in purple boxes. The lowest energy partial shell icosahedral  $\text{Cu}_{101}$  cluster is given here in a blue box as a reference.

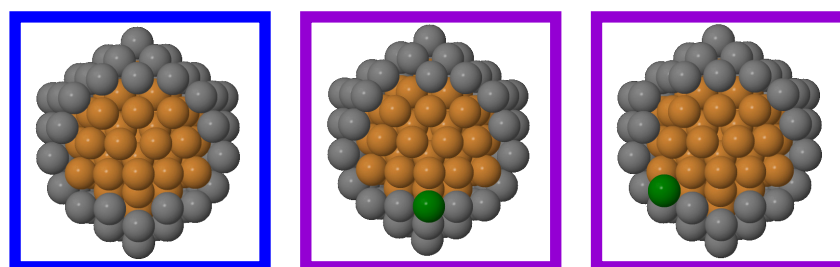

Figure S2 Various structures of the partial shell icosahedral  $\text{Cu}_{124}$  clusters with rearranged atoms about the lining of the shell. Selected examples of these rearranged partial shell icosahedral  $\text{Cu}_{124}$  clusters are given in purple boxes. The lowest energy partial shell icosahedral  $\text{Cu}_{124}$  cluster is given here in a blue box as a reference.

### 3 Relative energies of Cu clusters with adatoms or vacancies

Figures S3 to S5 show the relative energies of:

- various  $\text{Cu}_{54}$ ,  $\text{Cu}_{55}$ , and  $\text{Cu}_{56}$  clusters (Figure S3),
- various  $\text{Cu}_{77}$ ,  $\text{Cu}_{78}$ , and  $\text{Cu}_{79}$  clusters (Figure S4), and
- various  $\text{Cu}_{144}$ ,  $\text{Cu}_{147}$ , and  $\text{Cu}_{150}$  clusters (Figure S5).

The energies of these Cu clusters have been relative to their perfect, closed-shell icosahedral form or the lowest energy form of  $I_h$  with a partial icosahedral shell.

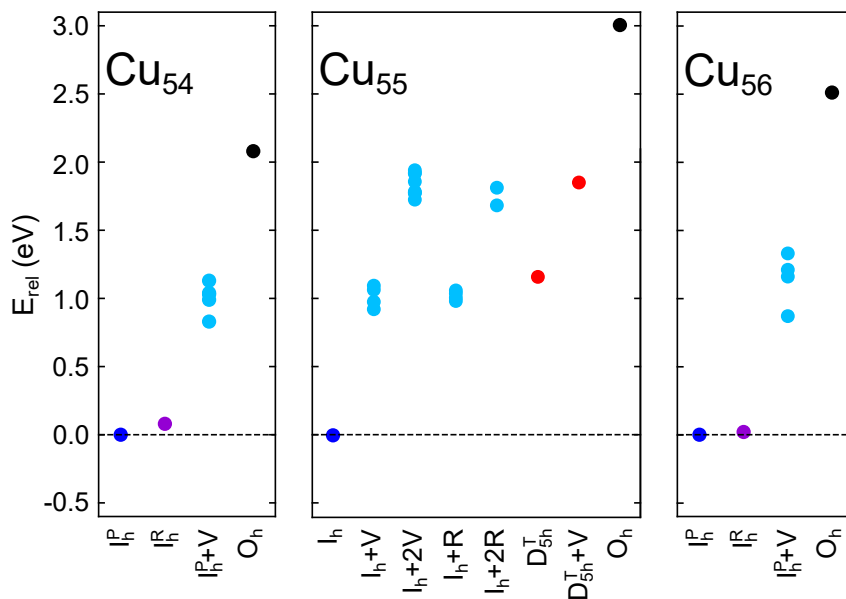

Figure S3 DFT energies of various  $\text{Cu}_{54}$ ,  $\text{Cu}_{55}$ , and  $\text{Cu}_{56}$  clusters. The energies are all given relative to the perfect, closed shell icosahedral  $\text{Cu}_{55}$  cluster, or the lowest energy partial shell icosahedral  $\text{Cu}_{54}$  or  $\text{Cu}_{56}$  cluster.  $I_h$ : The perfect, closed-shell icosahedral cluster;  $I_h^P$ : The lowest energy form of  $I_h$  with a partial icosahedral shell;  $I_h^E$ : The elongated icosahedral cluster;  $I_h^R$ :  $I_h$  with a rearranged partial icosahedral shell; V: A vacant site; R: A rosette reconstruction;  $D_{5h}^T$ : A perfect, closed-shell twisted decahedral cluster;  $O_h$ : Versions of the octahedral motif.

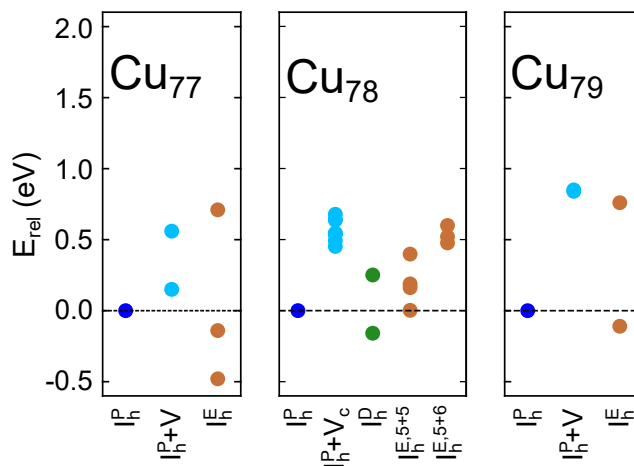

Figure S4 DFT energies of various  $\text{Cu}_{77}$ ,  $\text{Cu}_{78}$ , and  $\text{Cu}_{79}$  clusters. The energies are all given relative to the lowest energy partial shell icosahedral  $\text{Cu}_{77}$ ,  $\text{Cu}_{78}$ , or  $\text{Cu}_{79}$  cluster.  $I_h^P$ : The lowest energy form of  $I_h$  with a partial icosahedral shell;  $I_h^R$ :  $I_h$  with a rearranged partial icosahedral shell;  $I_h^{E,5+5}$ : The elongated icosahedral clusters with two five fold caps;  $I_h^{E,5+6}$ : The elongated icosahedral clusters with a five fold cap and a six fold cap;  $I_h^D$ : The distorted icosahedral clusters; V: A vacant site;  $V_c$ : A vacant corner site.

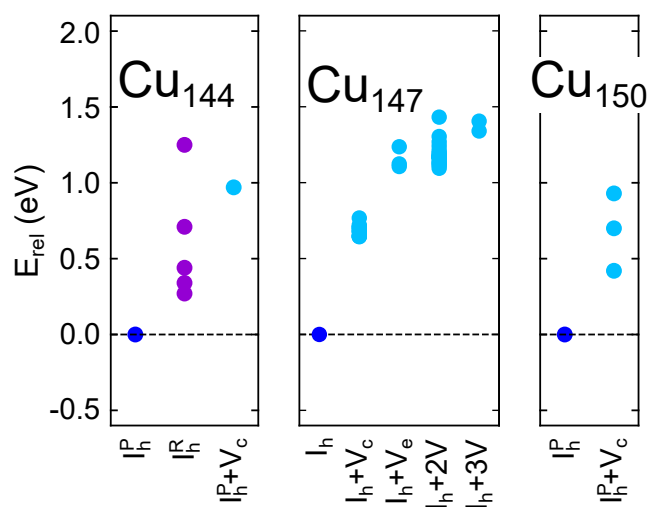

Figure S5 DFT energies of various Cu<sub>144</sub>, Cu<sub>147</sub>, and Cu<sub>150</sub> clusters. The energies are all given relative to the perfect, closed shell icosahedral Cu<sub>147</sub> cluster, or the lowest energy partial shell icosahedral Cu<sub>144</sub> or Cu<sub>150</sub> cluster. I<sub>h</sub>: The perfect, closed-shell icosahedral cluster; I<sub>h</sub><sup>P</sup>: The lowest energy form of I<sub>h</sub> with a partial icosahedral shell; I<sub>h</sub><sup>R</sup>: I<sub>h</sub> with a rearranged partial icosahedral shell; V: A vacant site; V<sub>c</sub>: A vacant corner site; V<sub>e</sub>: A vacant edge site;

## 4 Adsorption energies and adsorption sites

Tables S2 to S4 show the energies and describe the site types for the lowest energy adsorption sites of intermediates upon various surfaces, respectively. Only the COOH, CO, and CHO site types and energies are given for Cu<sub>78,c</sub>, Cu<sub>54,cv</sub>, Cu<sub>54,ev</sub>, Cu<sub>56,6fc</sub>, and Cu<sub>56,ad</sub>. Images of the lowest energy adsorption sites of intermediates upon the icosahedral Cu<sub>55</sub> and Cu<sub>147</sub> clusters, as well as on Cu<sub>78,a</sub> and Cu<sub>78,b</sub>, are shown in Figures S6 to S10.

Table S2 Adsorption energies of intermediates upon various extended surfaces and Cu clusters. The lower the energy, the stronger the adsorbate binds to the surface of the Cu surface/cluster. All energies are given in eV.

| Absorbate          | Flat (111)        | A Step (533) | B Step (553) | A edge | B edge | Cu <sub>55</sub> | Cu <sub>147</sub> | Cu <sub>78,a</sub> | Cu <sub>78,b</sub>     | Cu <sub>78,c</sub> |
|--------------------|-------------------|--------------|--------------|--------|--------|------------------|-------------------|--------------------|------------------------|--------------------|
| COOH <sup>c</sup>  | 0.76              | 0.46         | 0.48         | 0.52   | 0.50   | 0.49             | 0.47              | 0.38               | -0.03                  | 0.16               |
| CO                 | 0.98              | 0.81         | 0.82         | 0.91   | 0.86   | 0.71             | 0.94              | 0.60               | 0.64/0.68 <sup>b</sup> | 0.66               |
| CHO                | 1.54              | 1.29         | 1.31         | 1.35   | 1.34   | 1.29             | 1.37              | 1.09               | 0.84                   | 1.00               |
| COH                | 2.12              | 2.08         | 2.13         | 1.98   | 2.17   | 2.02             | 2.33              | 1.78               | 1.89                   |                    |
| CH <sub>2</sub> O  | 0.92 <sup>a</sup> | 0.91         | 0.92         | 0.98   | 0.95   | 0.90             | 1.07              | 0.71               | 0.78                   |                    |
| CHOH               | 1.80              | 1.39         | 1.43         | 1.54   | 1.56   | 1.67             | 1.71              | 1.50               | 1.18                   |                    |
| CH <sub>3</sub> O  | 0.06              | -0.10        | -0.15        | -0.10  | -0.10  | -0.05            | -0.16             | -0.44              | -0.52                  |                    |
| CH <sub>2</sub> OH | 1.06              | 0.71         | 0.78         | 0.83   | 0.82   | 0.82             | 0.86              | 0.64               | 0.35                   |                    |
| CH <sub>3</sub>    | 0.16              | -0.20        | -0.17        | -0.14  | -0.15  | -0.05            | -0.14             | -0.36              | -0.53                  |                    |
| CH <sub>2</sub>    | 1.11              | 0.94         | 0.91         | 1.02   | 1.05   | 0.92             | 1.01              | 0.66               | 0.63                   |                    |
| CH                 | 1.68              | 1.32         | 1.66         | 1.23   | 1.69   | 1.35             | 1.74              | 1.17               | 0.93/1.16 <sup>b</sup> |                    |
| C                  | 3.05              | 2.16         | 2.97         | 2.06   | 2.61   | 2.49             | 2.83              | 2.08               | 1.91/2.26 <sup>b</sup> |                    |
| OH                 | 0.03              | -0.20        | -0.24        | -0.27  | -0.18  | -0.12            | -0.19             | -0.51              | -0.68                  |                    |
| O                  | 0.72              | 0.61         | 0.51         | 0.48   | 0.55   | 0.54             | 0.52              | 0.17               | 0.38/0.50 <sup>b</sup> |                    |

<sup>a</sup>Did not bind.

<sup>b</sup>Two adsorption energies are given. The first is the adsorption energy for the strongest binding site. This binding site is located on the other side of the cluster from where the \*COOH moiety initially adsorbs. The second is the adsorption energy of a preferable binding site near where the \*COOH moiety initially adsorbs.

<sup>c</sup>-0.45 added to energy to account for the poor description of C=O bonds with DFT.<sup>2</sup>

Table S3 Site types of the lowest energy adsorption sites of intermediates on various extended surfaces and Cu clusters, corresponding to adsorption energies in Table S2.

| Absorbate          | Flat (111)       | A step (533) | B step (553) | A edge  | B edge  | Cu <sub>55</sub> | Cu <sub>147</sub> | Cu <sub>78,a</sub> | Cu <sub>78,b</sub>         | Cu <sub>78,c</sub> |
|--------------------|------------------|--------------|--------------|---------|---------|------------------|-------------------|--------------------|----------------------------|--------------------|
| COOH               | top-top          | top-top      | top-top      | top-top | top-top | top-top          | top-top           | top-top            | top-top                    | top-top            |
| CO                 | top              | top          | top          | top     | top     | top (corner)     | top (corner)      | hollow             | bridge/bridge <sup>b</sup> | top                |
| CHO                | top              | top          | top          | top     | top     | top (C)          | top (C)           | bridge             | top                        | top-top            |
| COH                | FCC              | 4-fold       | FCC          | 4-fold  | FCC     | HCP              | HCP               | hollow             | HCP                        |                    |
| CH <sub>2</sub> O  | DNB <sup>a</sup> | top-top      | top-top      | top-top | top-top | top (corner)     | top (corner)      | bridge-top         | top                        |                    |
| CHOH               | bridge           | bridge       | bridge       | bridge  | bridge  | bridge           | bridge            | bridge             | bridge                     |                    |
| CH <sub>3</sub> O  | FCC              | bridge       | bridge       | bridge  | bridge  | HCP              | HCP               | hollow             | bridge                     |                    |
| CH <sub>2</sub> OH | top              | top          | top          | top     | top     | top (C)          | top (C)           | top                | top                        |                    |
| CH <sub>3</sub>    | bridge           | bridge       | bridge       | bridge  | bridge  | bridge           | top (corner)      | bridge             | bridge                     |                    |
| CH <sub>2</sub>    | FCC              | bridge       | bridge       | bridge  | bridge  | HCP              | bridge            | hollow             | bridge                     |                    |
| CH                 | FCC              | 4-fold       | FCC          | 4-fold  | FCC     | dist. 4-fold     | dist. 4-fold      | 4-fold             | 4-fold/4-fold <sup>b</sup> |                    |
| C                  | FCC              | 4-fold       | bridge       | 4-fold  | 4-fold  | dist. 4-fold     | dist. 4-fold      | 4-fold             | 4-fold/4-fold <sup>b</sup> |                    |
| OH                 | FCC              | bridge       | bridge       | bridge  | bridge  | HCP              | HCP               | hollow             | bridge                     |                    |
| O                  | FCC              | HCP          | FCC          | 4-fold  | FCC     | HCP              | HCP               | hollow             | hollow/4-fold <sup>b</sup> |                    |

<sup>a</sup>Did not bind.

<sup>b</sup>Two adsorption energies are given. The first is the adsorption energy for the strongest binding site. This binding site is located on the other side of the cluster from where the \*COOH moiety initially adsorbs. The second is the adsorption energy of a preferable binding site near where the \*COOH moiety initially adsorbs.

Table S4 Adsorption energies (in eV) and site types of the lowest energy adsorption sites of intermediates on various Cu<sub>54</sub> and Cu<sub>56</sub> clusters. Here “cv” and “ev” refer to clusters with a corner and edge vacancy, respectively, “6fc” is a six-fold corner and “ad” is an adatom.

| Absorbate | Cu <sub>54,cv</sub> | Cu <sub>54,ev</sub>                | Cu <sub>56,6fc</sub> | Cu <sub>56,ad</sub>     |
|-----------|---------------------|------------------------------------|----------------------|-------------------------|
| COOH      | 0.25<br>top-top     | 0.46<br>top-top                    | 0.51<br>top-top      | 0.32<br>top-bridge      |
| CO        | 0.62<br>bridge      | 0.72<br>top (next to vacancy site) | 0.69<br>top          | 0.66<br>top (on adatom) |
| CHO       | 1.08<br>top         | 1.14<br>top (next to vacancy site) | 1.13<br>bridge       | 1.28<br>top (on adatom) |

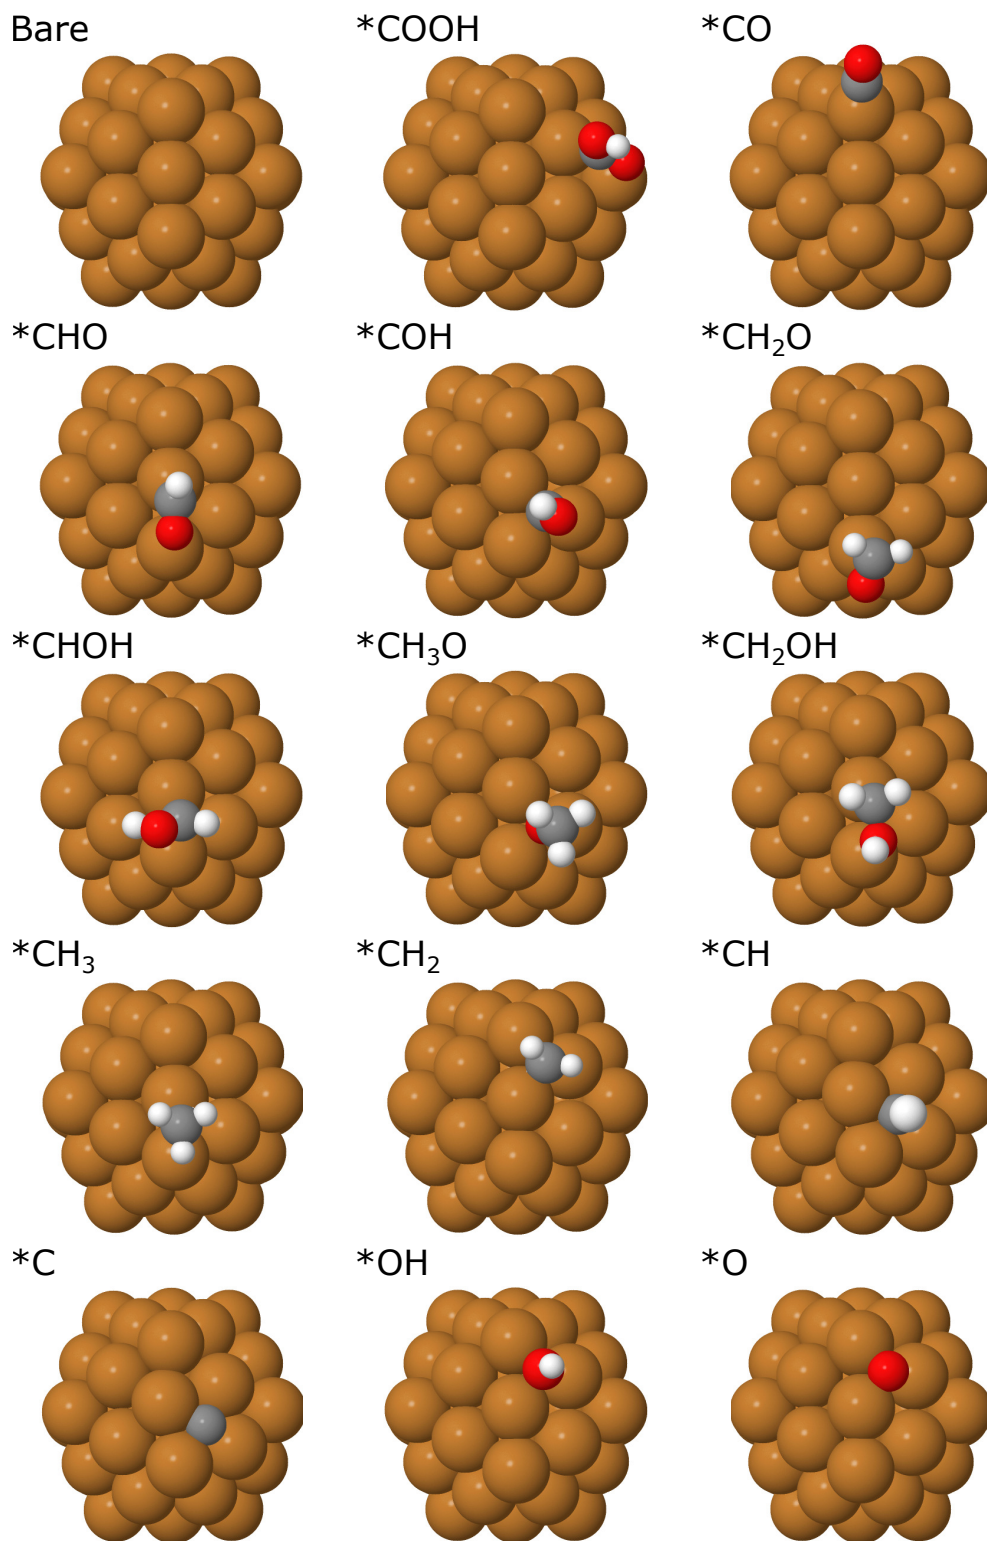

Figure S6 Lowest energy binding sites of adsorbates on the Cu<sub>55</sub> cluster.



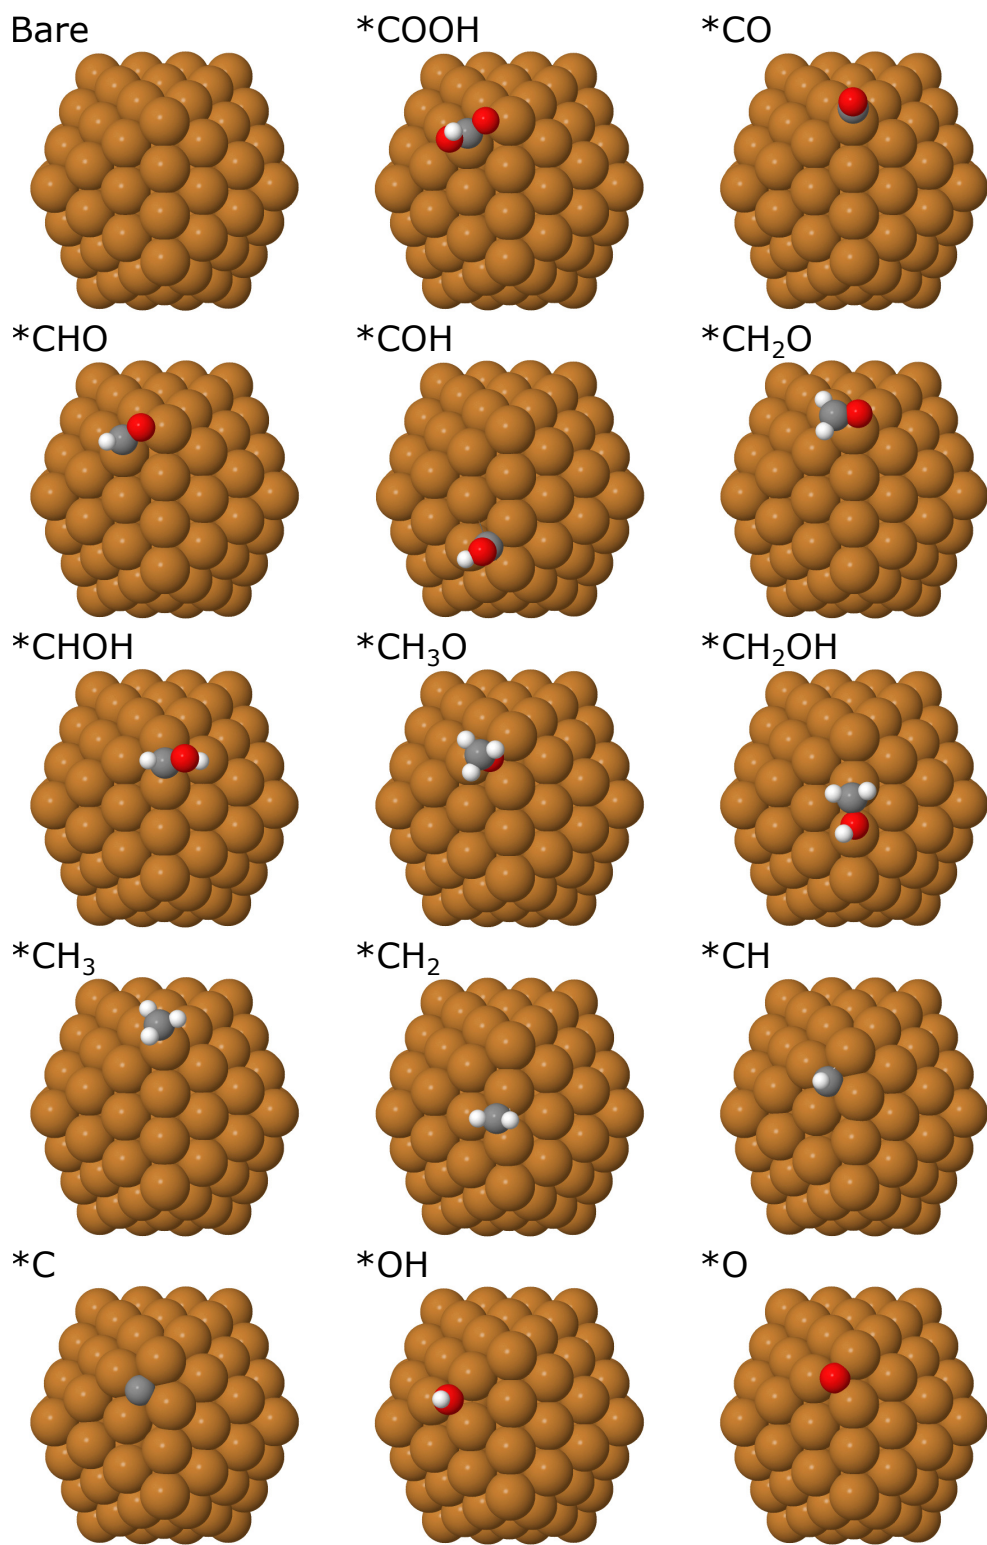

Figure S7 Lowest energy binding sites of adsorbates on the Cu<sub>17</sub> cluster.

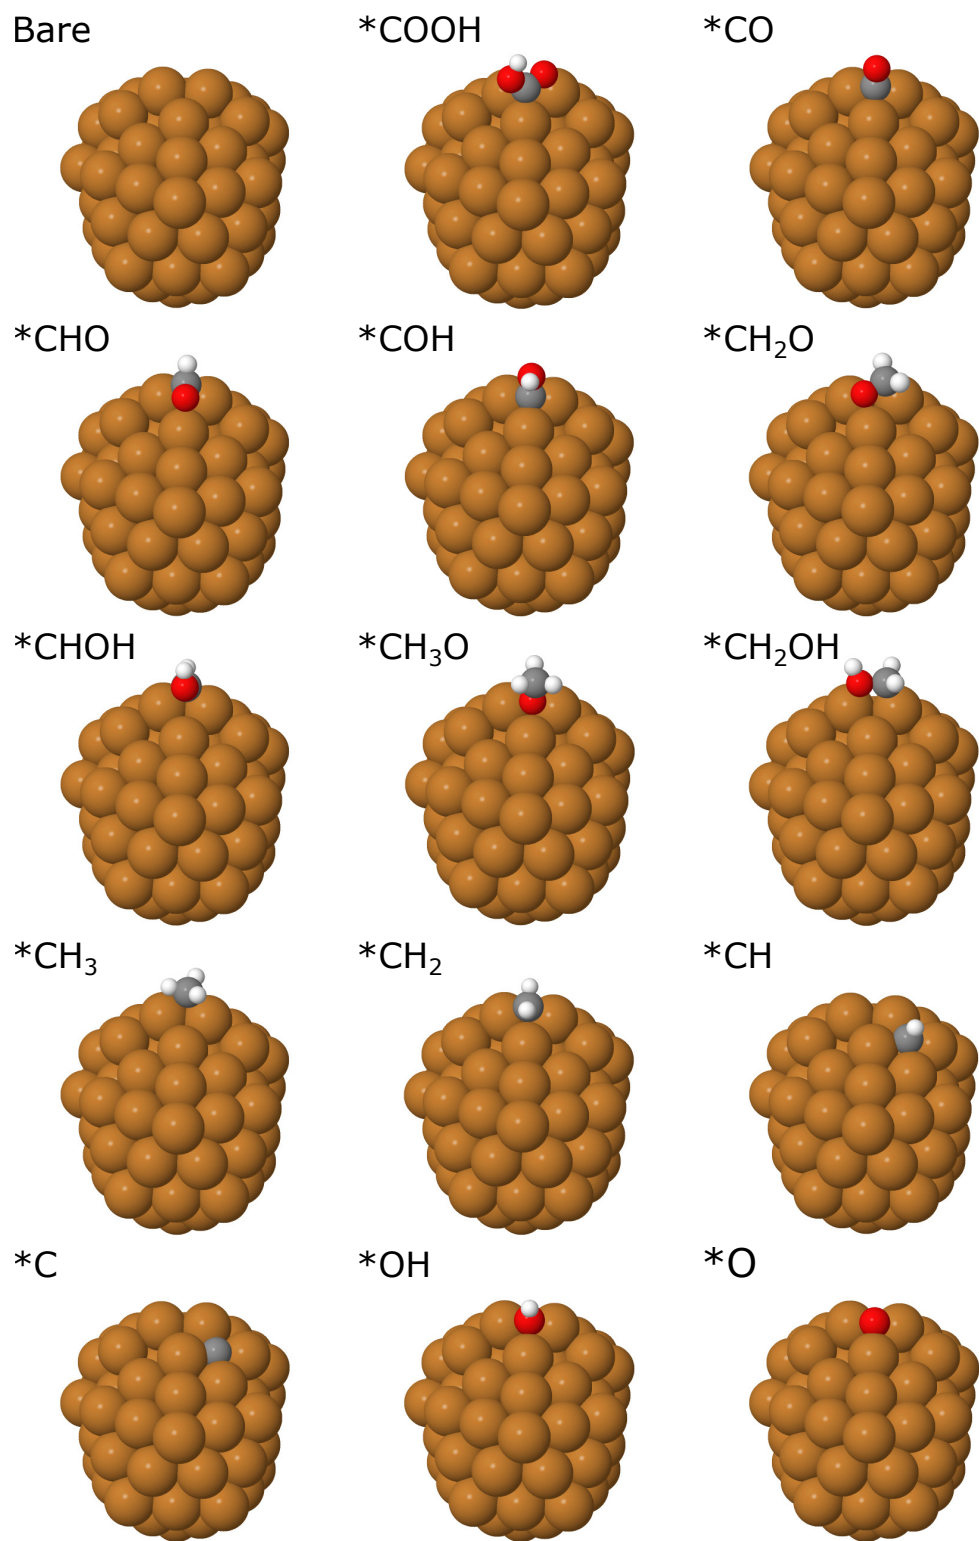

Figure S8 Lowest energy binding sites of adsorbates on the Cu<sub>78,a</sub> cluster.

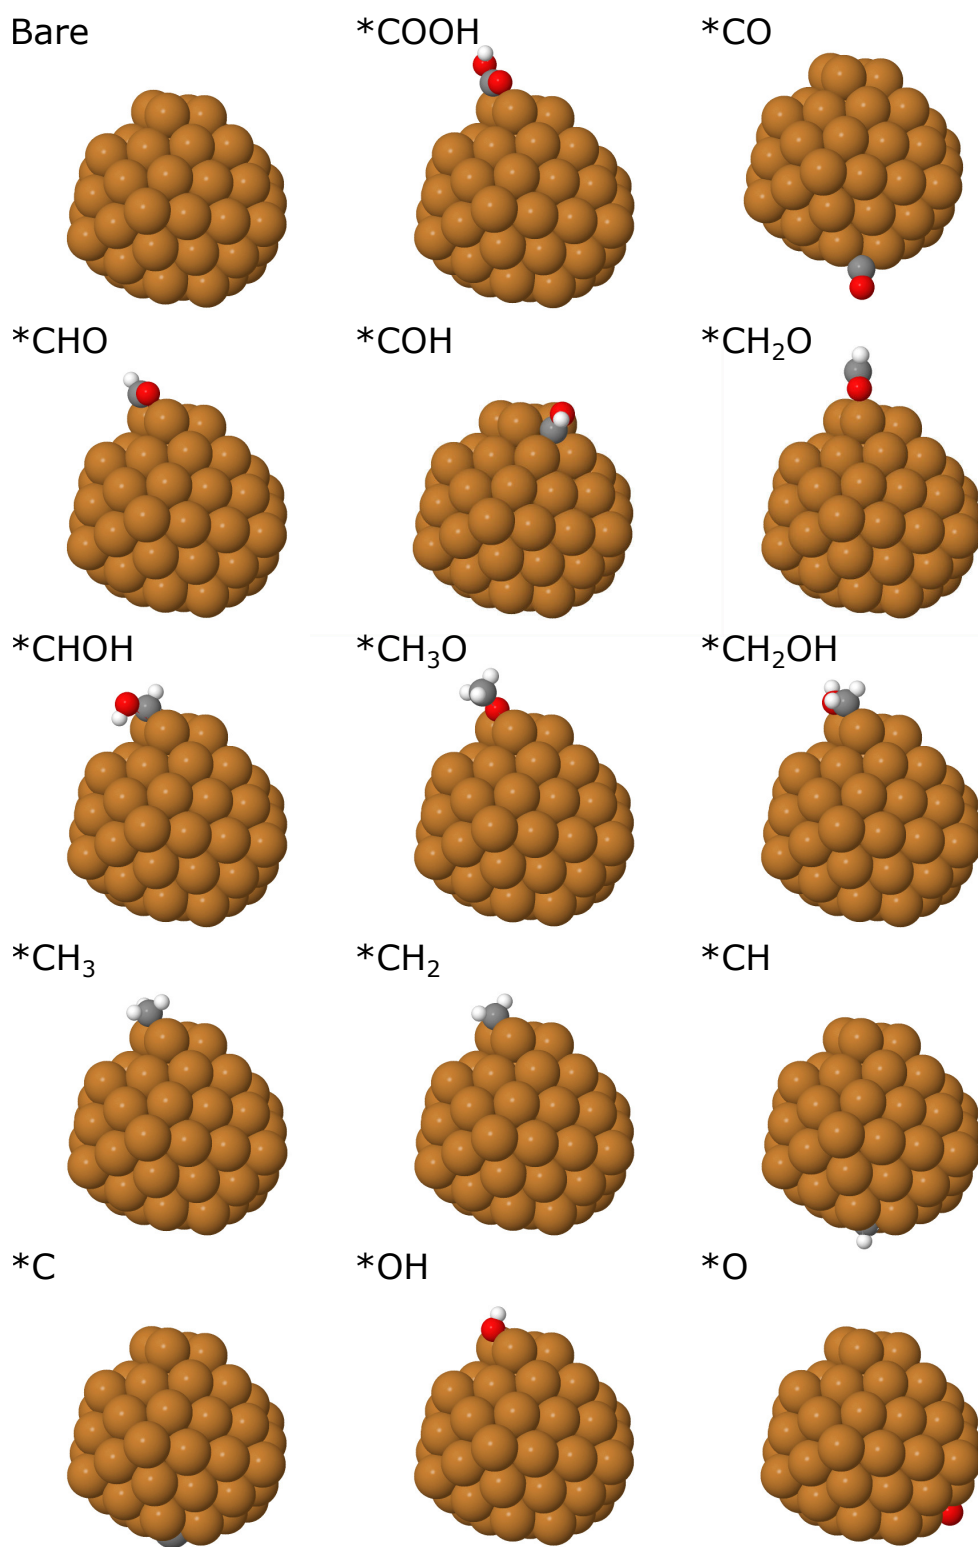

Figure S9 Lowest energy binding sites of adsorbates on the Cu<sub>78,b</sub> cluster.

Bare

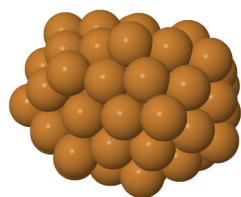

\*COOH

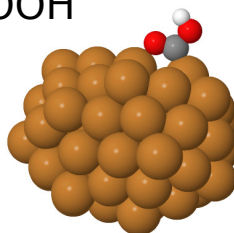

\*CO

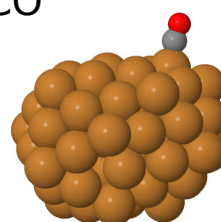

\*CHO

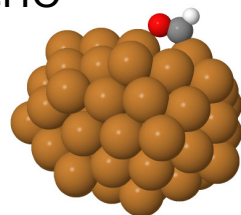

The above image is taken from the back of the  $\text{Cu}_{78,c}$  cluster.

Figure S10 Lowest energy binding sites of adsorbates on the  $\text{Cu}_{78,c}$  cluster. Only the bare cluster and the cluster with a \*COOH, \*CO, and \*CHO adsorbate are shown. The image of the cluster with a \*CO adsorbed to it is shown from the backside of the cluster.

## 5 Free energy diagrams of Cu surface models and clusters

The free energy diagrams at the limiting potential of A and B step surfaces, A and B edge surfaces, icosahedral Cu<sub>55</sub> and Cu<sub>147</sub> clusters, and Cu<sub>78,a</sub>, Cu<sub>78,b</sub> and Cu<sub>78,c</sub> clusters, are shown in Figures S11 to S19.

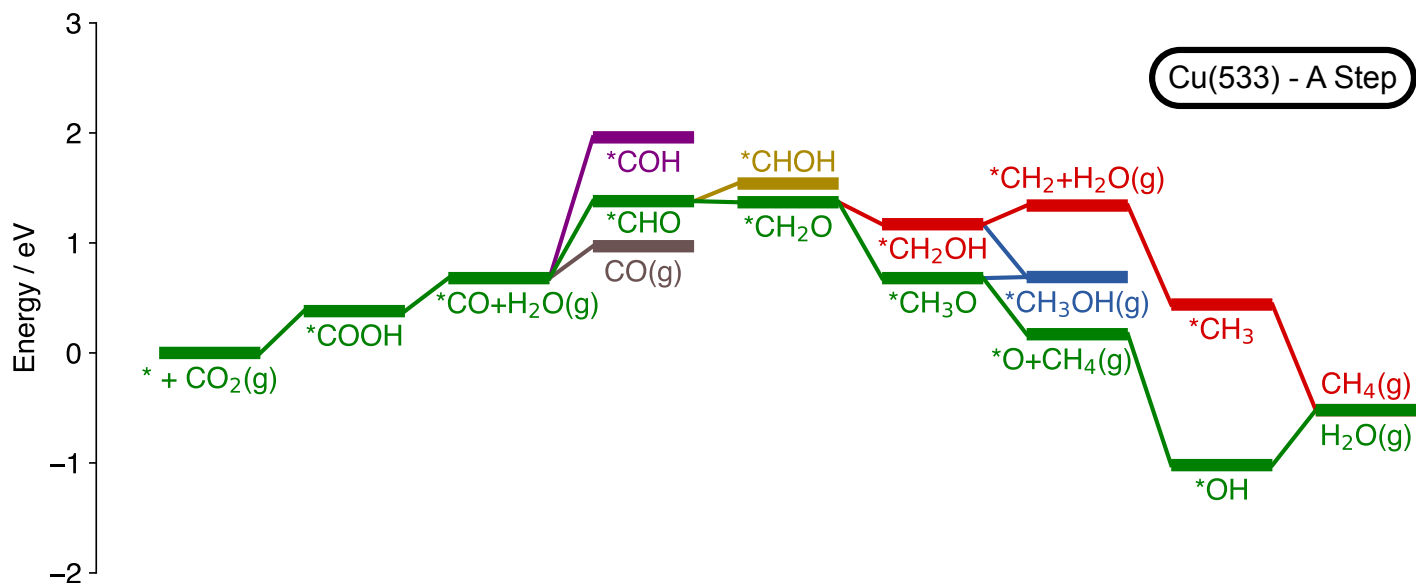

Figure S11 Free energy diagram for the reduction of CO<sub>2</sub> towards methane, methanol and CO on an A step surface. \* indicates the adsorption site.

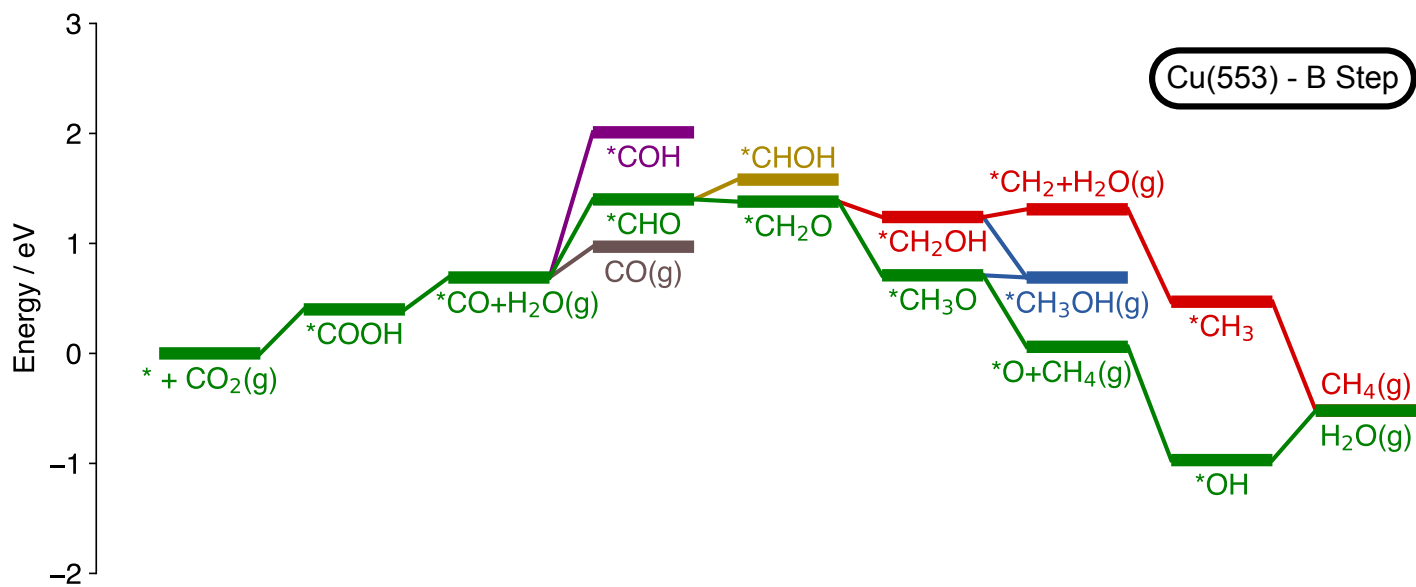

Figure S12 Free energy diagram for the reduction of CO<sub>2</sub> towards methane, methanol and CO on a B step surface. \* indicates the adsorption site.

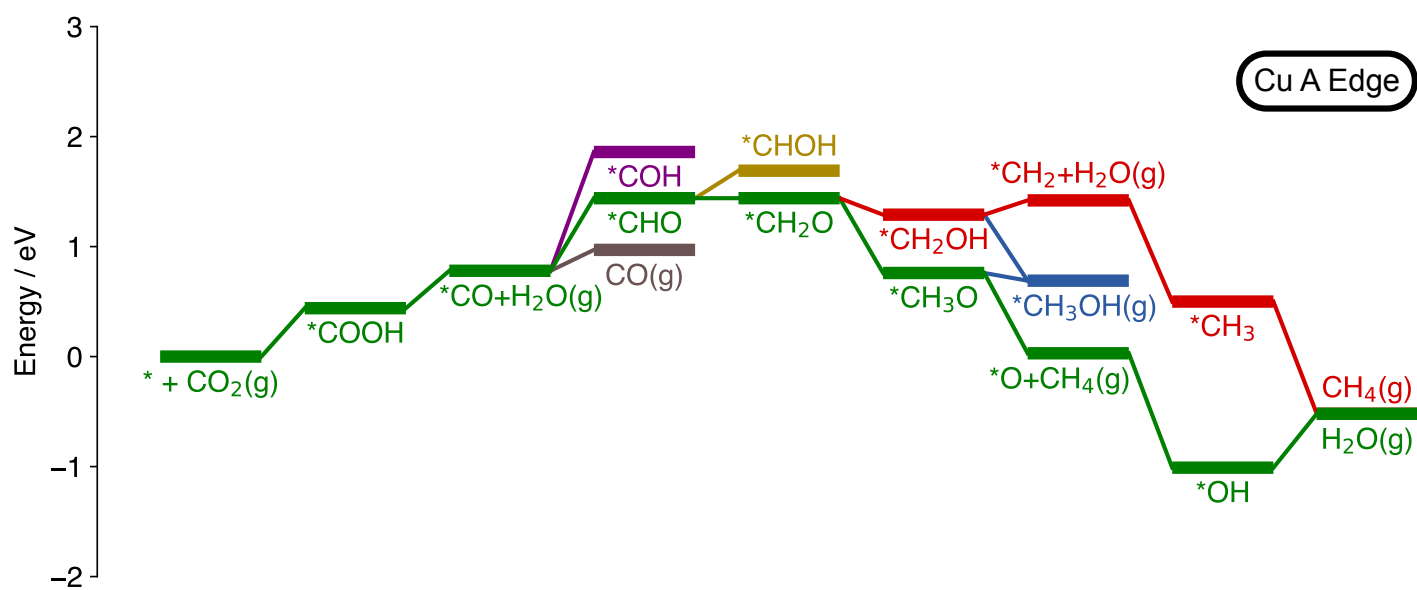

Figure S13 Free energy diagram for the reduction of  $\text{CO}_2$  towards methane, methanol and CO on an A edge surface. \* indicates the adsorption site.

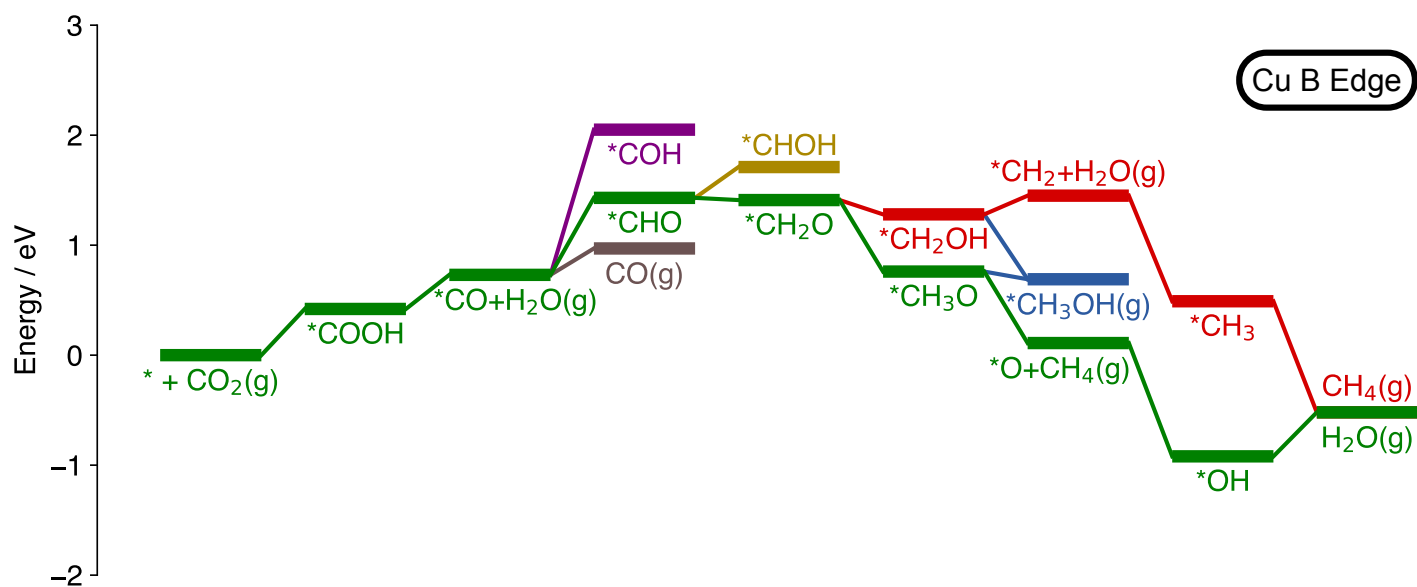

Figure S14 Free energy diagram for the reduction of  $\text{CO}_2$  towards methane, methanol and CO on a B edge surface. \* indicates the adsorption site.

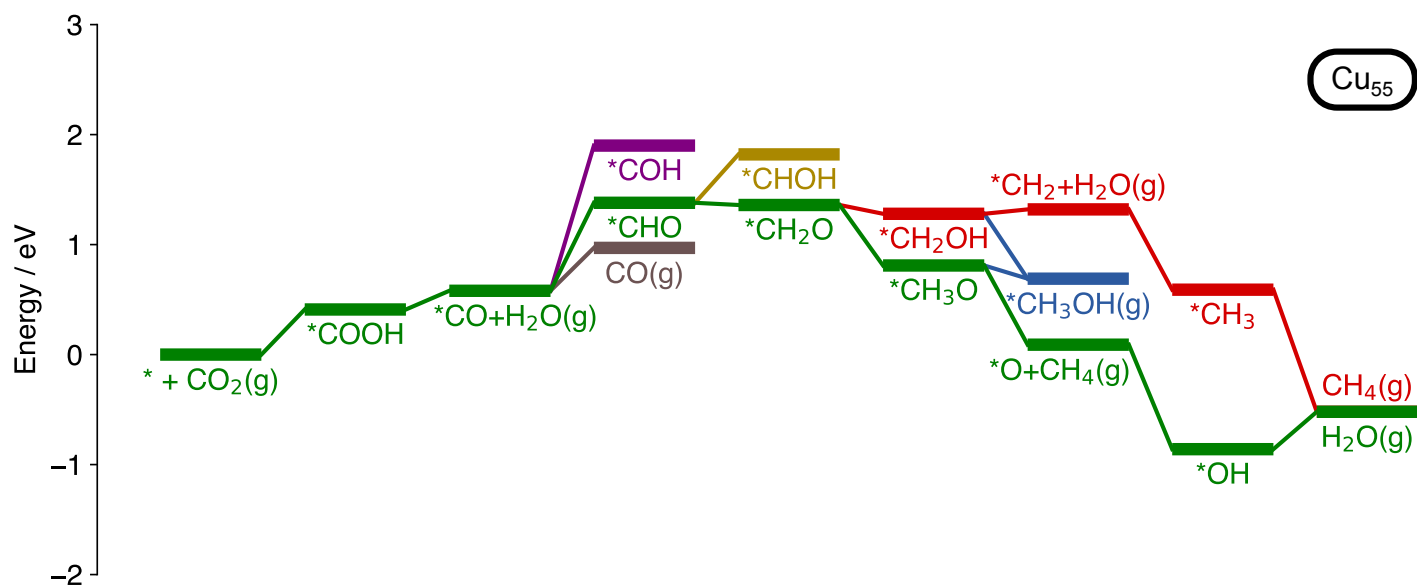

Figure S15 Free energy diagram for the reduction of  $\text{CO}_2$  towards methane, methanol and CO on a Mackay Icosahedral  $\text{Cu}_{55}$  cluster. \* indicates the adsorption site.

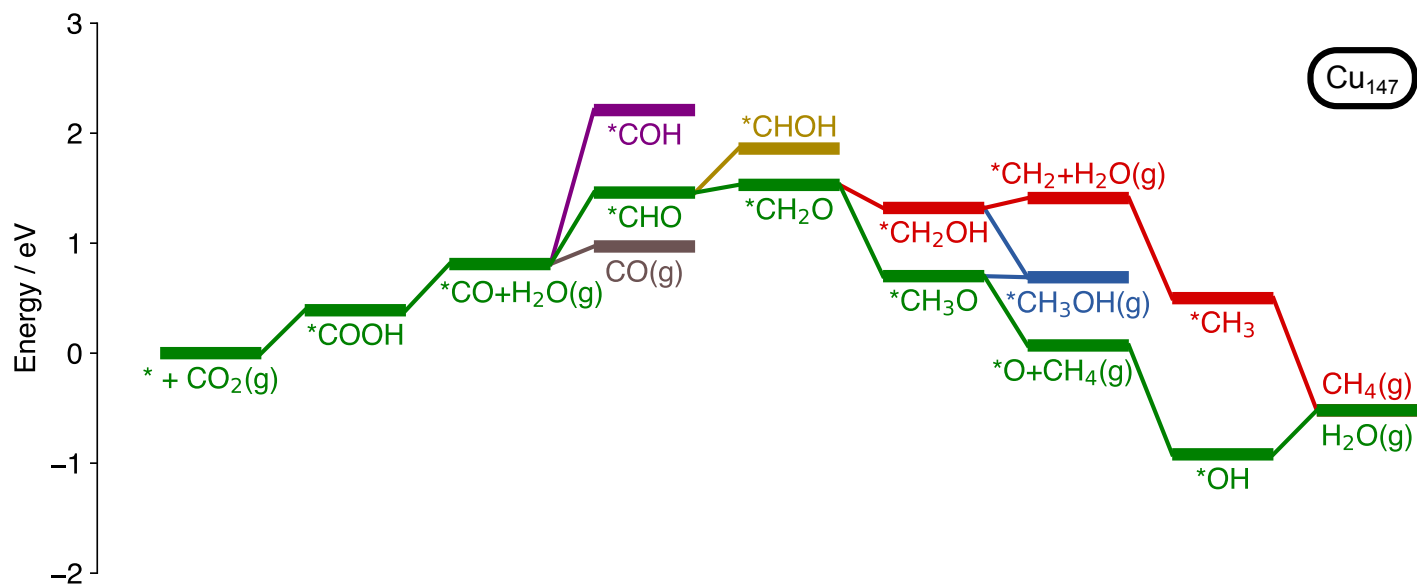

Figure S16 Free energy diagram for the reduction of  $\text{CO}_2$  towards methane, methanol and CO on a Mackay Icosahedral  $\text{Cu}_{147}$  cluster. \* indicates the adsorption site.

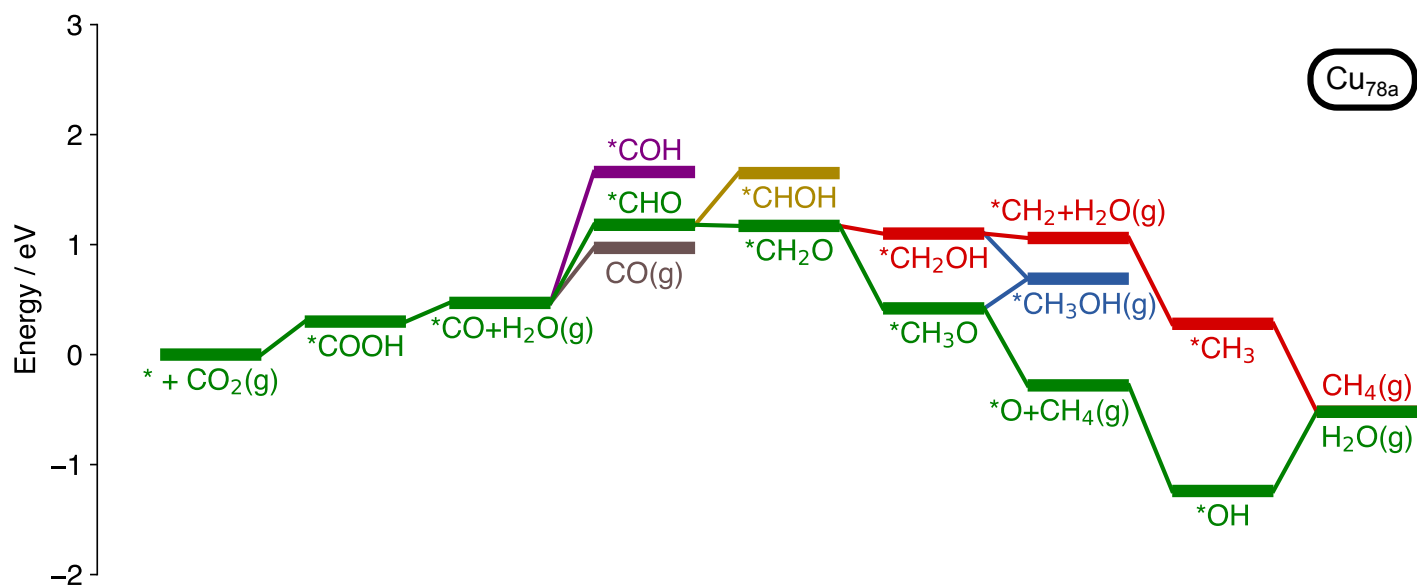

Figure S17 Free energy diagram for the reduction of  $\text{CO}_2$  towards methane, methanol and CO on a partial shell  $\text{Cu}_{78,a}$  cluster. \* indicates the adsorption site.

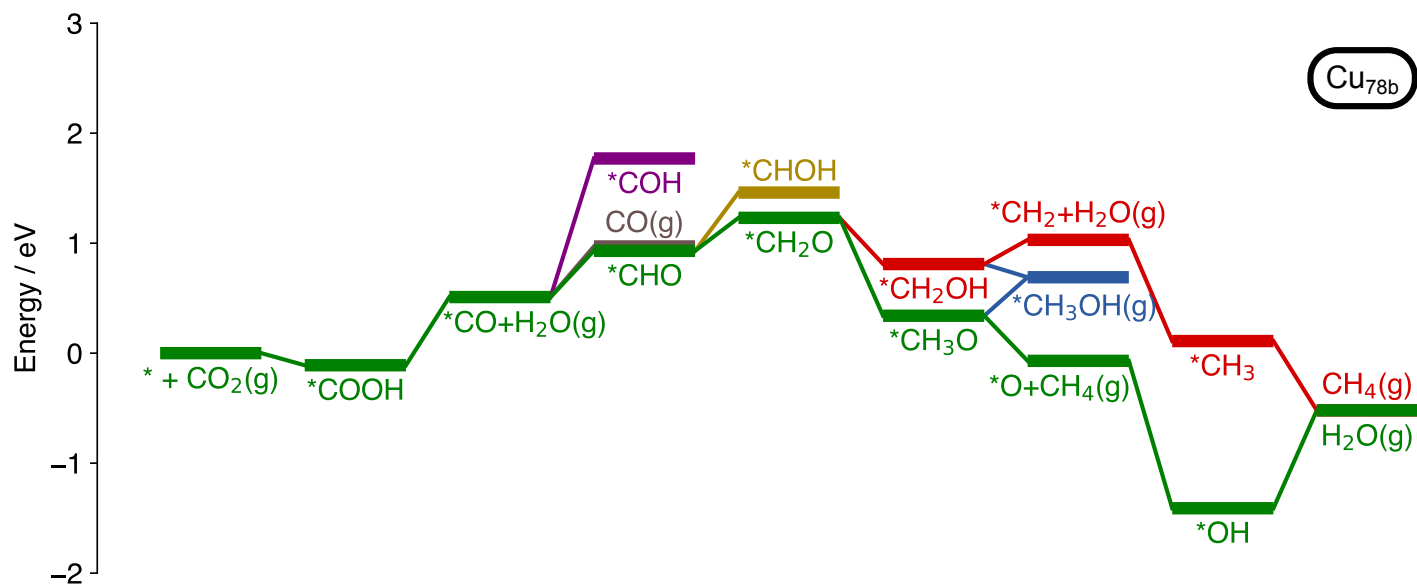

Figure S18 Free energy diagram for the reduction of  $\text{CO}_2$  towards methane, methanol and CO on the elongated  $\text{Cu}_{78,b}$  cluster. \* indicates the adsorption site.



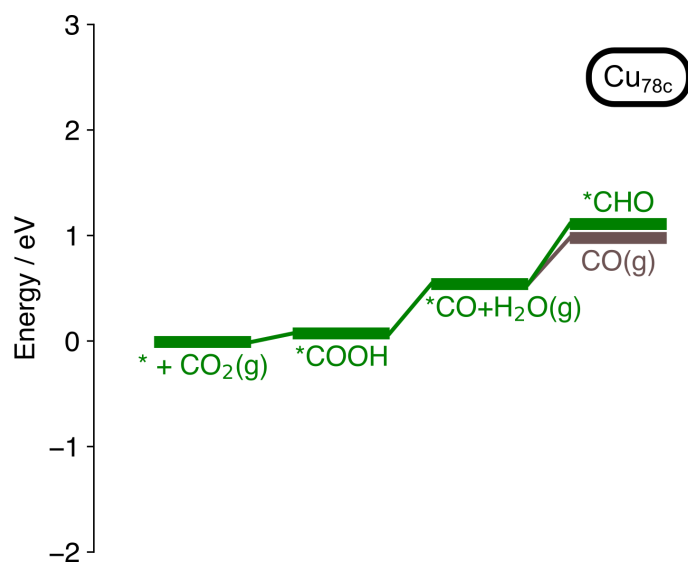

Figure S19 Free energy diagram for the reduction of CO<sub>2</sub> towards methane, methanol and CO on the distorted Cu<sub>78,c</sub> cluster. \* indicates the adsorption site. Only the first three steps of this mechanism are given.

## 6 Free energy diagrams at calculated limiting potentials

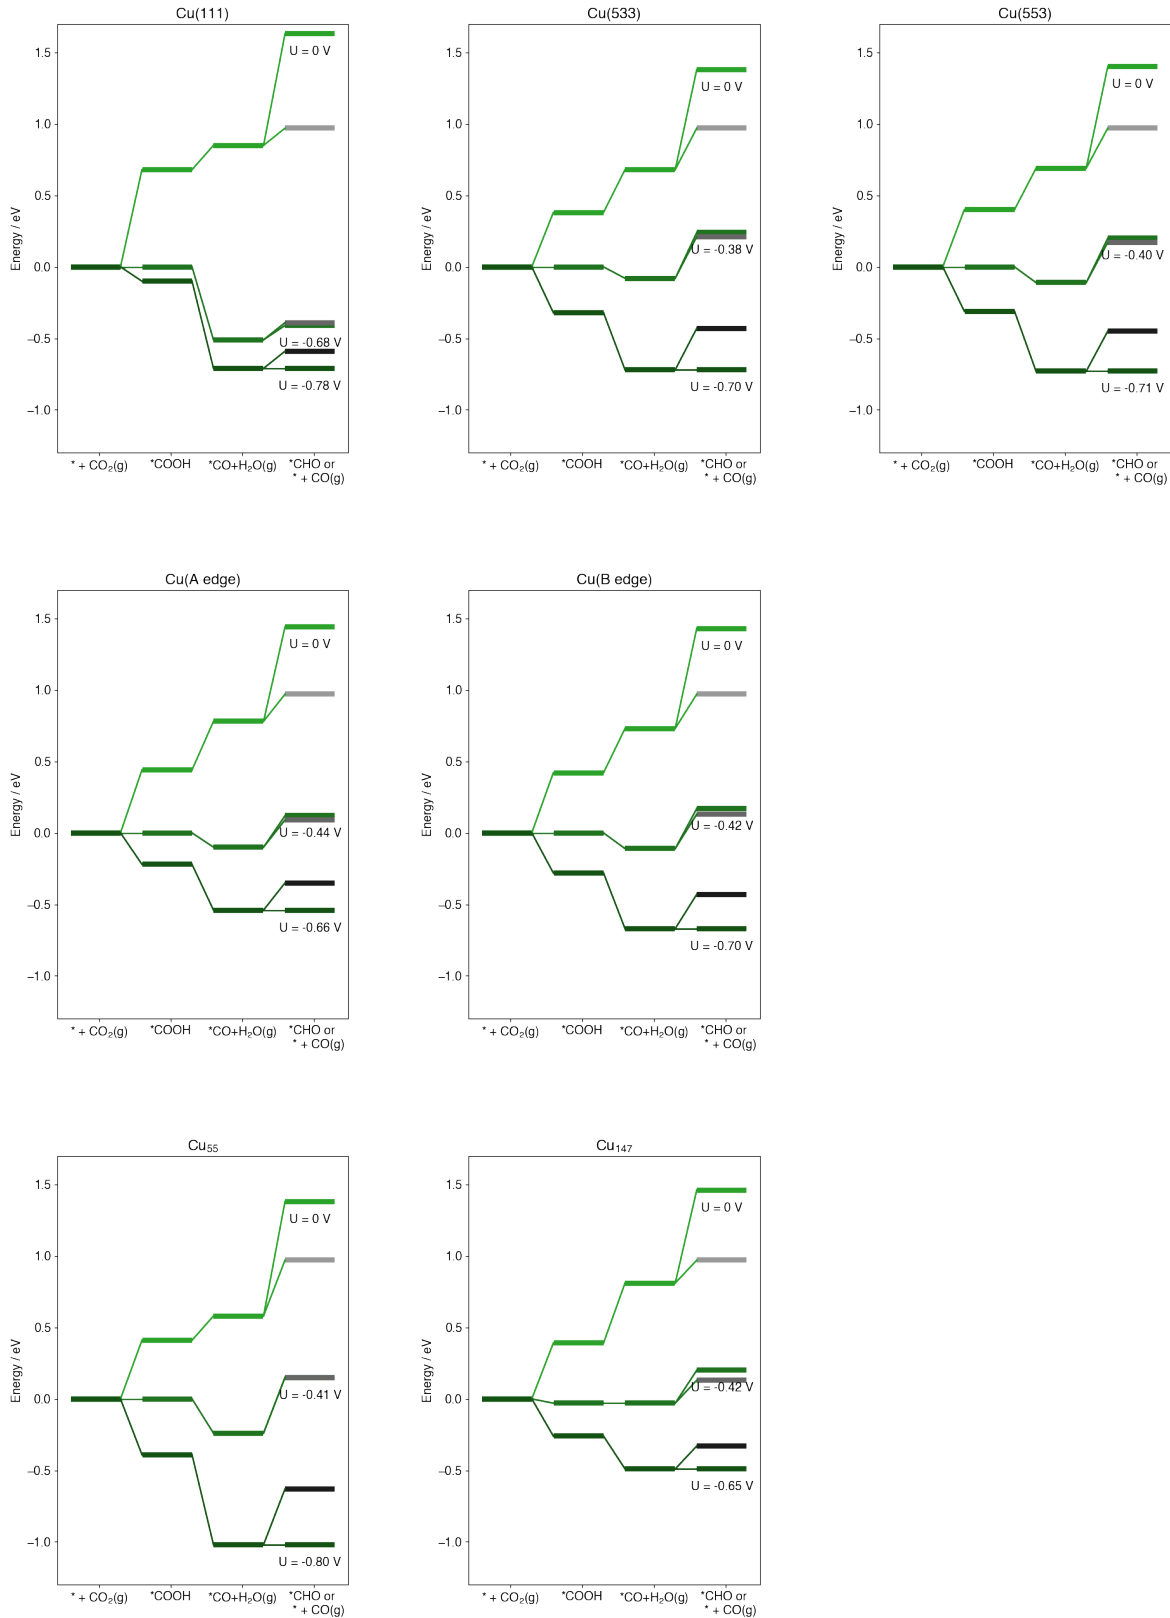

Figure S20 continued next page...

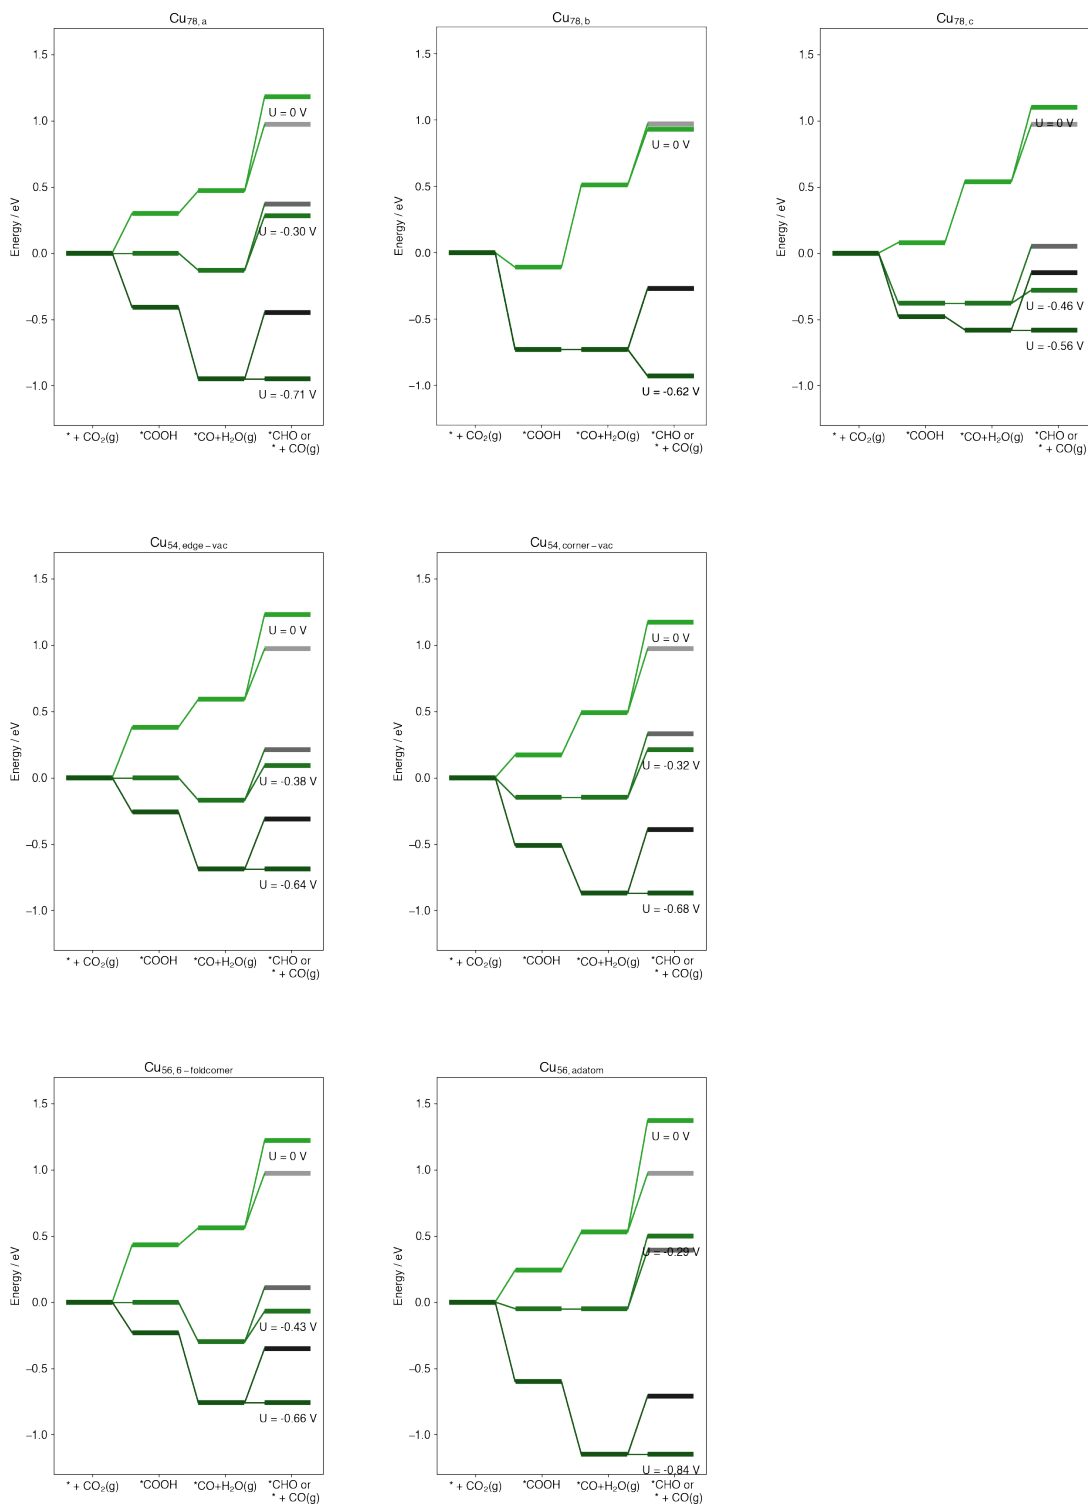

Figure S20 Free energy diagrams for CO<sub>2</sub>RR to CO, CH<sub>4</sub> and CH<sub>3</sub>OH at 0 V and at the calculated limiting potential for each product.

## 7 Structures of lowest energy off-size clusters

Figure S21 shows the lowest energy structures for off-size clusters, being  $\text{Cu}_{54-56}$ ,  $\text{Cu}_{77-79}$ , and  $\text{Cu}_{144-150}$ .

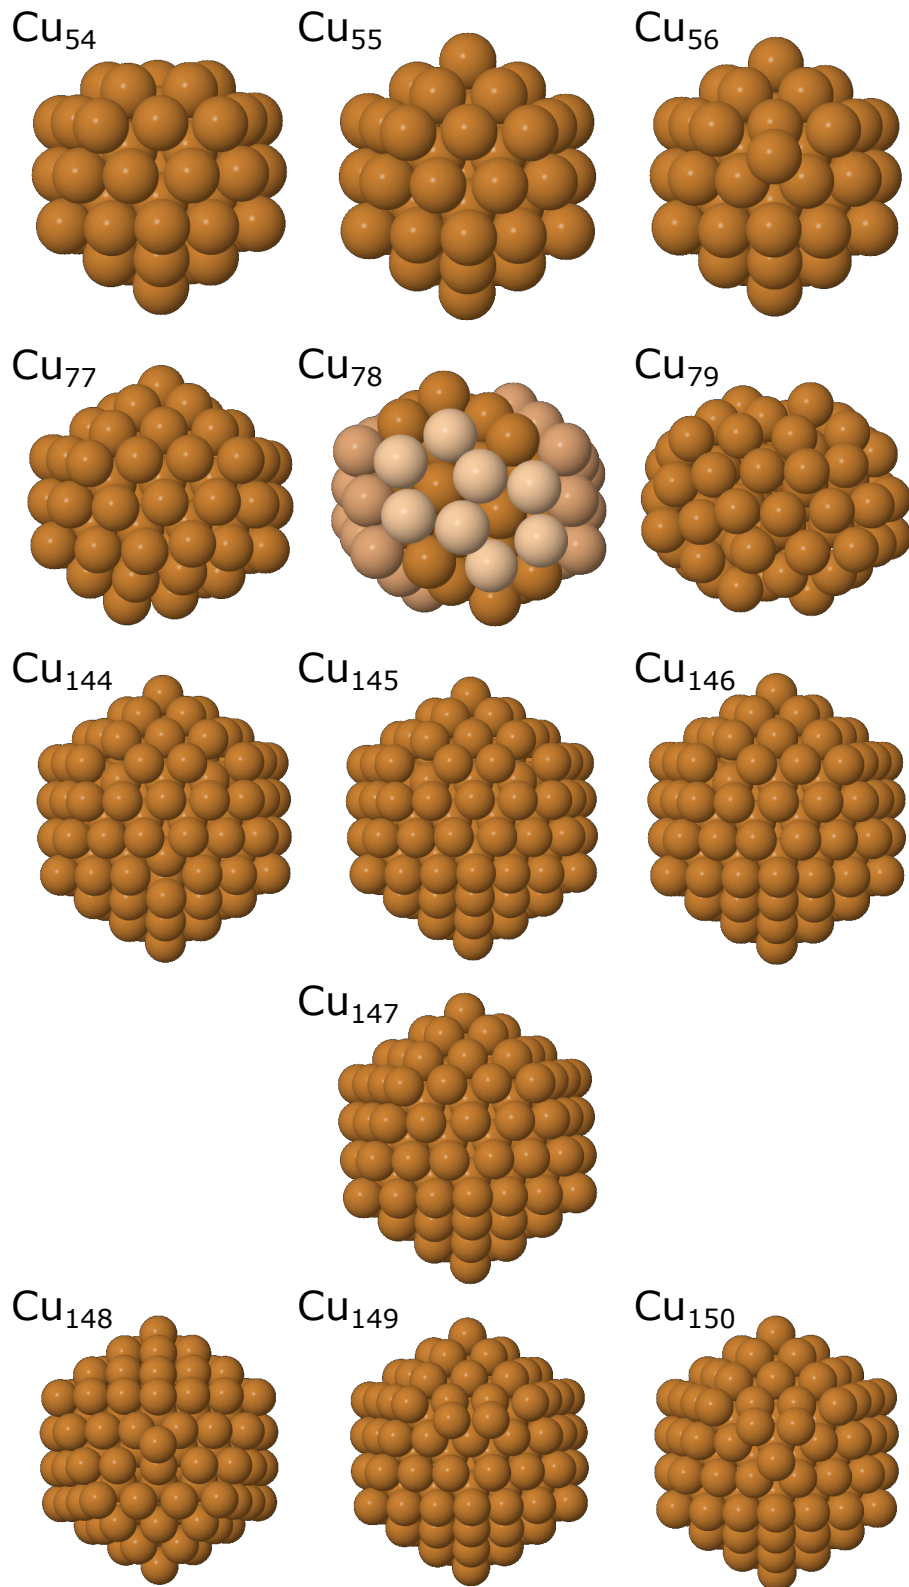

Figure S21 Global minima of  $\text{Cu}_{54-56}$ ,  $\text{Cu}_{77-79}$ , and  $\text{Cu}_{144-150}$ , after being re-optimised with DFT (with the PBE functional).

## 8 Geometric parameters and Bader charges of \*COOH

Table S5 COOH adsorption energy ( $E_{ads}$ ), net Bader charge and selected geometric parameters for bare catalyst and COOH(g) ("Free") and catalyst with adsorbed COOH ("Ads.").

|                                 | $E_{ads} / \text{eV}$ | Geometric parameters |       |            |       | Net Bader charge / $e^-$ |             |       |       |      |      |
|---------------------------------|-----------------------|----------------------|-------|------------|-------|--------------------------|-------------|-------|-------|------|------|
|                                 |                       | R(Cu-Cu) / Å         |       | R(C-O) / Å |       | Cu(C)                    |             | Cu(O) |       | COOH |      |
|                                 |                       | Free                 | Ads.  | Free       | Ads.  | Free                     | Ads.        | Free  | Ads.  | Free | Ads. |
| Cu(111)                         | 0.98                  | 2.616                | 2.676 | 1.197      | 1.256 | 0.02                     | -0.13       | 0.02  | -0.19 | 0    | 0.45 |
| B edge                          | 0.50                  | 2.616                | 2.701 | 1.197      | 1.263 | 0.04                     | -0.14       | 0.04  | -0.26 | 0    | 0.47 |
| Cu <sub>55</sub>                | 0.49                  | 2.563                | 2.759 | 1.197      | 1.264 | 0.01                     | -0.14       | 0.06  | -0.20 | 0    | 0.57 |
| Cu <sub>147</sub>               | 0.47                  | 2.558                | 2.751 | 1.197      | 1.268 | 0.00                     | -0.16       | 0.05  | -0.20 | 0    | 0.52 |
| Cu <sub>78,a</sub> <sup>a</sup> | 0.38                  | N/A                  | N/A   | 1.197      | 1.272 | 0.01/0.01                | -0.14/-0.09 | 0.05  | -0.20 | 0    | 0.57 |
| Cu <sub>78,b</sub>              | -0.03                 | 2.491                | 2.784 | 1.197      | 1.268 | 0.04                     | -0.18       | 0.03  | -0.25 | 0    | 0.50 |
| Cu <sub>78,c</sub>              | 0.16                  | 3.085                | 3.260 | 1.197      | 1.261 | 0.01                     | -0.18       | -0.01 | -0.23 | 0    | 0.52 |

<sup>a</sup> COOH adsorbs with C bridging two Cu atoms for Cu<sub>78,a</sub>

## 9 Density of states of \*COOH

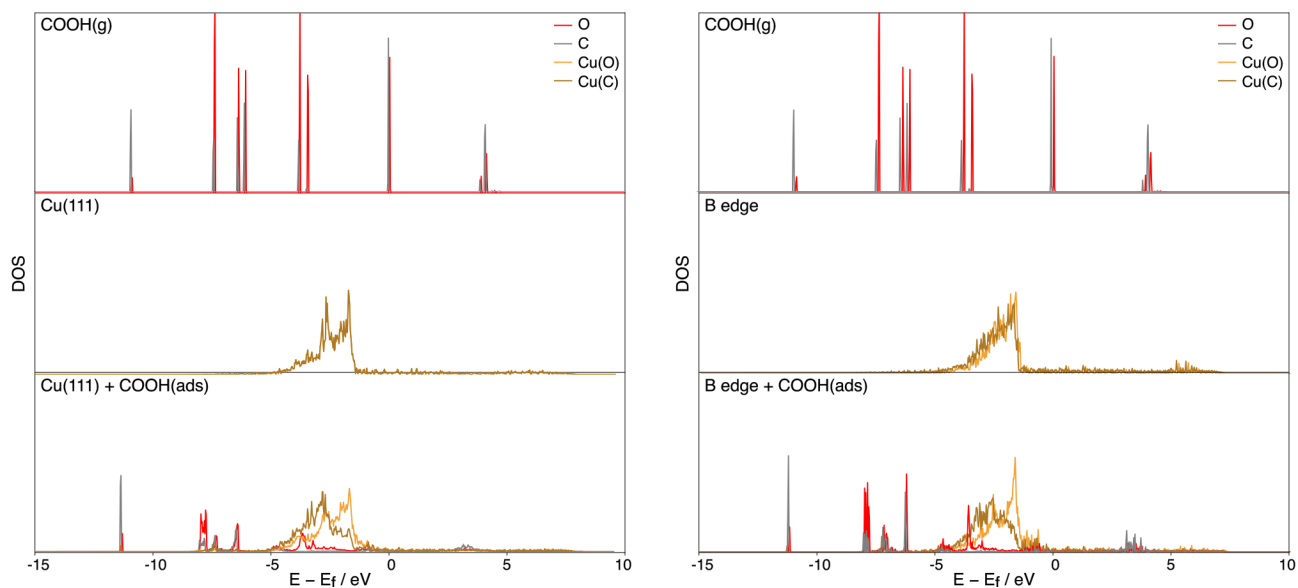

Figure S22 Density of states (DOS) for COOH(g) (top panel), bare Cu catalyst (middle panel) and combined system with COOH adsorbed on the catalyst (bottom) for Cu(111) (left) and B edge (right). DOS are projected onto the atoms of interest where Cu(C) indicates the Cu atom nearest to the C atom of COOH and Cu(O) indicates the Cu atom nearest to the carbonyl O atom.

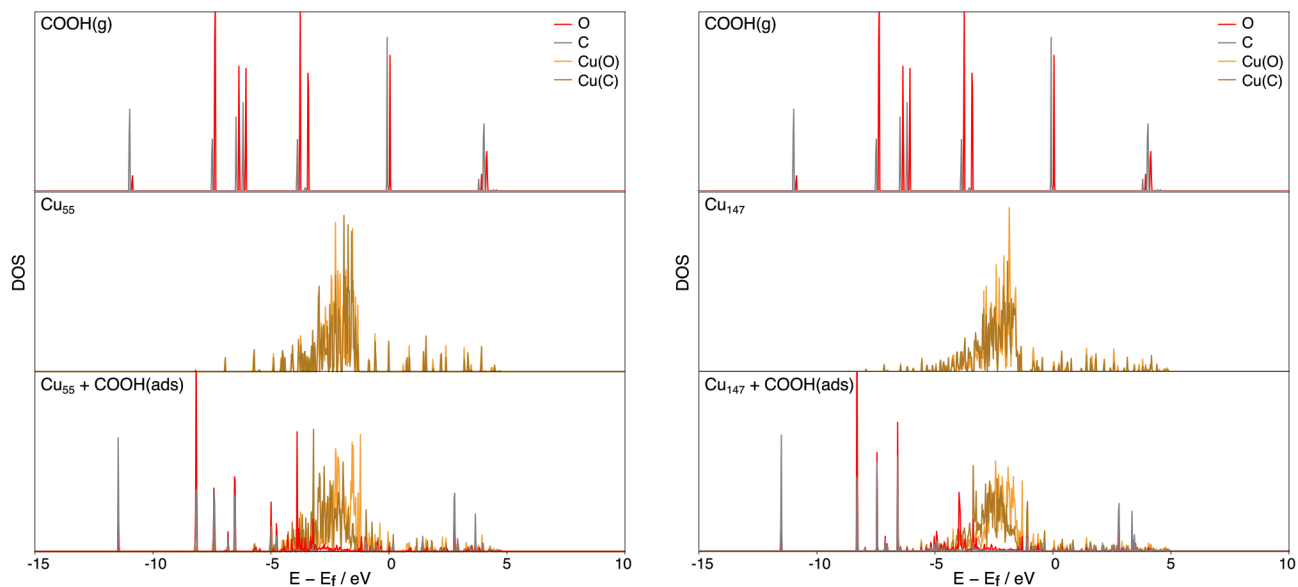

Figure S23 Density of states (DOS) for COOH(g) (top panel), bare Cu catalyst (middle panel) and combined system with COOH adsorbed on the catalyst (bottom) for Cu<sub>55</sub> (left) and Cu<sub>147</sub> (right). DOS are projected onto the atoms of interest where Cu(C) indicates the Cu atom nearest to the C atom of COOH and Cu(O) indicates the Cu atom nearest to the carbonyl O atom.

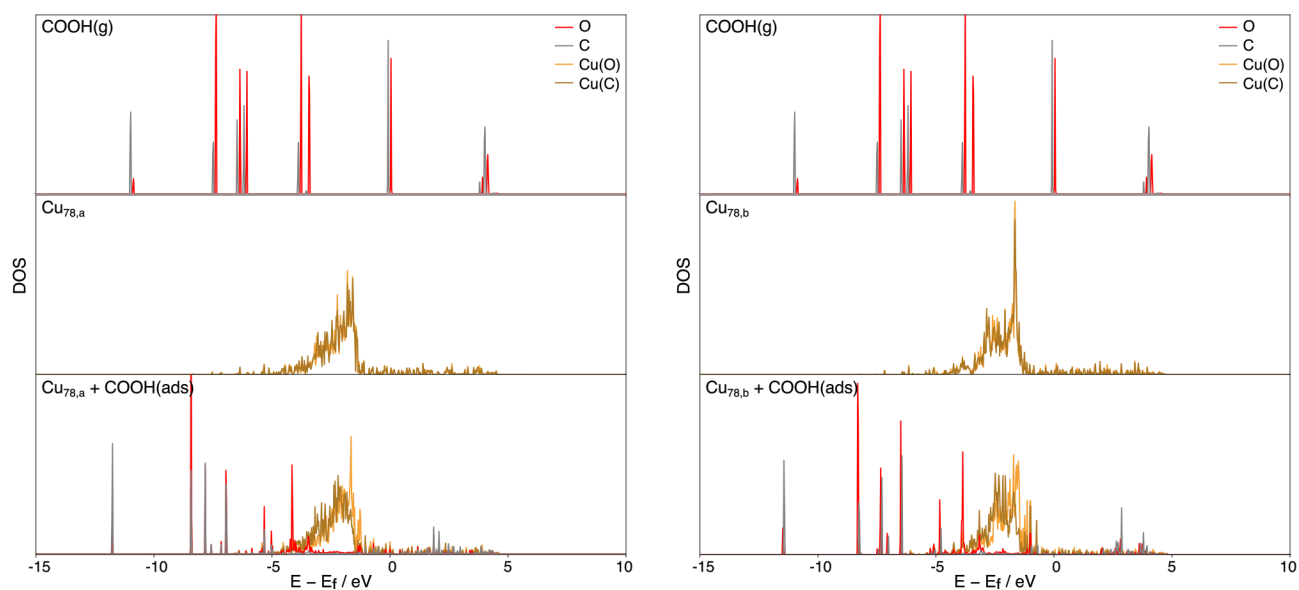

Figure S24 Density of states (DOS) for  $\text{COOH(g)}$  (top panel), bare Cu catalyst (middle panel) and combined system with  $\text{COOH}$  adsorbed on the catalyst (bottom) for  $\text{Cu}_{78,a}$  (left) and  $\text{Cu}_{78,b}$  (right). DOS are projected onto the atoms of interest where  $\text{Cu(C)}$  indicates the Cu atom nearest to the C atom of  $\text{COOH}$  and  $\text{Cu(O)}$  indicates the Cu atom nearest to the carbonyl O atom.

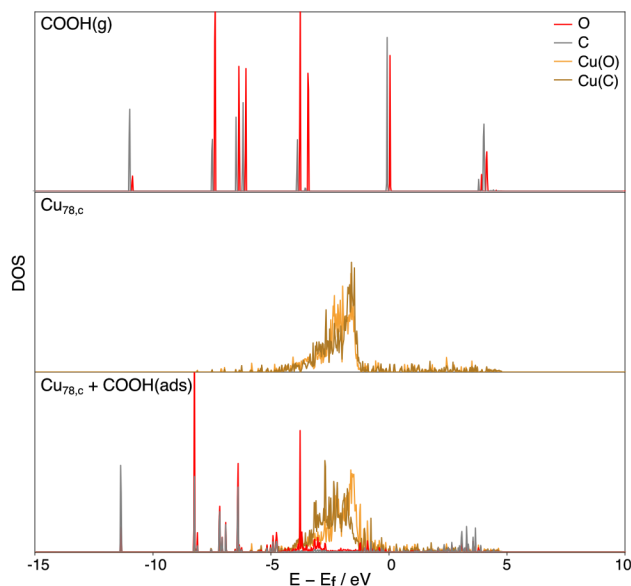

Figure S25 Density of states (DOS) for  $\text{COOH(g)}$  (top panel), bare Cu catalyst (middle panel) and combined system with  $\text{COOH}$  adsorbed on the catalyst (bottom) for  $\text{Cu}_{78,c}$ . DOS are projected onto the atoms of interest where  $\text{Cu(C)}$  indicates the Cu atom nearest to the C atom of  $\text{COOH}$  and  $\text{Cu(O)}$  indicates the Cu atom nearest to the carbonyl O atom.



## Notes and references

[1] F. Cleri and V. Rosato, *Phys. Rev. B*, 1993, **48**, 22–33.

[2] A. A. Peterson, F. Abild-Pedersen, F. Studt, J. Rossmeisl and J. K. Nørskov, *Energy Environ. Sci.*, 2010, **3**, 1311–1315.
